# Supplementary material
Source: Springer Nature journal article supplement (https://www.springermedizin.de/resource/supplementary/12985_2010_1082_MOESM10_ESM.pdf/9609104)

**A**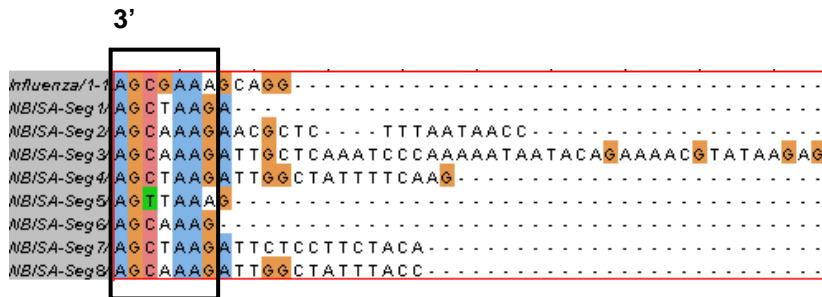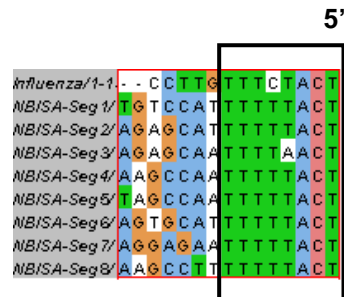**B**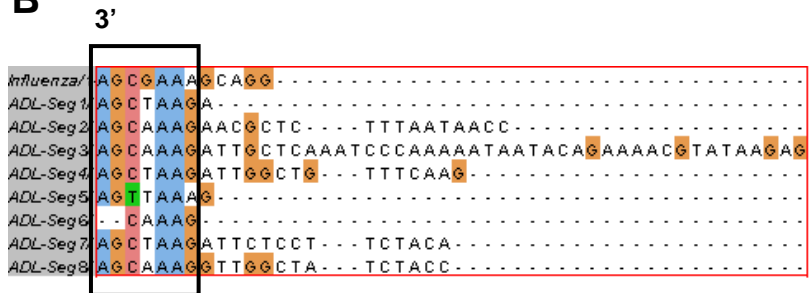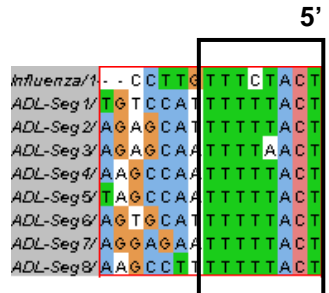

Supplement: MOESM10 [file 9609104]
